# Supplementary material for: Research on the detection method of eight benzene metabolites in urine based on UPLC-MS/MS
Source: Royal Society of Chemistry journal article supplement (doi:10.1039/d5ay01766a), 2025-12-10
Supplement: d5ay01766a1.xlsx [file d5ay01766a1.xlsx]

## Sheet: Sheet2
本底值	加标后	加标量	回收率		本底值	加标后	加标量	回收率		本底值	加标后	加标量	回收率
0	1	1	1		0	1	1	1		0	1	1	1
0	0.5	1	0.5		0	0.5	1	0.5		0	0.5	1	0.5
tt-MA					tt-MA					tt-MA
0.027	5.542	5	1.103		0.027	21.076	20	1.05245		0.027	47.66	50	0.95266
0.027	4.895	5	0.9736		0.027	19.647	20	0.981		0.027	47.803	50	0.95552
0.027	4.352	5	0.865		0.027	20.365	20	1.0169		0.027	48.162	50	0.9627
0.027	5.376	5	1.0698		0.027	21.437	20	1.0705		0.027	47.233	50	0.94412
0.027	4.843	5	0.9632		0.027	21.1	20	1.05365		0.027	50.049	50	1.00044
0.027	5.001	5	0.9948		0.027	18.792	20	0.93825		0.027	48.262	50	0.9647
均值	5.0015		0.9949			20.4028		1.01879			48.1948		0.963357
标准差			0.0844135					0.0508733					0.0196127
RSD			0.0848462					0.049935					0.0203587
2-MHA					2-MHA					2-MHA
0.016	5.237	5	1.0442		0.016	21.874	20	1.0929		0.016	53.209	50	1.06386
0.016	5.502	5	1.0972		0.016	22.125	20	1.10545		0.016	52.729	50	1.05426
0.016	4.848	5	0.9664		0.016	22.015	20	1.09995		0.016	50.377	50	1.00722
0.016	4.886	5	0.974		0.016	22.47	20	1.1227		0.016	51.425	50	1.02818
0.016	5.322	5	1.0612		0.016	21.893	20	1.09385		0.016	51.582	50	1.03132
0.016	4.839	5	0.9646		0.016	21.357	20	1.06705		0.016	52.801	50	1.0557
	5.10567		1.01793			21.9557		1.09698			52.0205		1.04009
标准差			0.0570533					0.0182446					0.021488
RSD			0.0560482					0.0166316					0.0206598
BMA					BMA					BMA
0	5.497	5	1.0994		0	18.129	20	0.90645		0	45.941	50	0.91882
0	4.496	5	0.8992		0	18.189	20	0.90945		0	47.109	50	0.94218
0	5.056	5	1.0112		0	19.07	20	0.9535		0	47.202	50	0.94404
0	4.883	5	0.9766		0	18.096	20	0.9048		0	46.322	50	0.92644
0	4.581	5	0.9162		0	19.699	20	0.98495		0	46.979	50	0.93958
0	4.249	5	0.8498		0	19.124	20	0.9562		0	46.137	50	0.92274
均值	4.79367		0.958733			18.7178		0.935892			46.615		0.9323
标准差			0.0895308					0.0336508					0.0109168
RSD			0.0933845					0.0359558					0.0117095
MA					MA					MA
0	4.379	5	0.8758		0	20.373	20	1.01865		0	48.331	50	0.96662
0	5.387	5	1.0774		0	21.784	20	1.0892		0	45.777	50	0.91554
0	5.258	5	1.0516		0	20.279	20	1.01395		0	46.547	50	0.93094
0	5.122	5	1.0244		0	22.045	20	1.10225		0	47.465	50	0.9493
0	5.08	5	1.016		0	19.144	20	0.9572		0	46.264	50	0.92528
0	5.063	5	1.0126		0	19.284	20	0.9642		0	45.996	50	0.91992
均值	5.04817		1.00963			20.4848		1.02424			46.73		0.9346
标准差			0.0700461					0.0608961					0.019598
RSD			0.0693778					0.0594548					0.0209694
PGA					PGA					PGA
0	4.858	5	0.9716		0	20.541	20	1.02705		0	44.207	50	0.88414
0	4.935	5	0.987		0	21.272	20	1.0636		0	46.52	50	0.9304
0	5.25	5	1.05		0	22.524	20	1.1262		0	46.094	50	0.92188
0	4.967	5	0.9934		0	23.084	20	1.1542		0	44.055	50	0.8811
0	5.319	5	1.0638		0	23.067	20	1.15335		0	44.985	50	0.8997
0	4.753	5	0.9506		0	23.205	20	1.16025		0	45.505	50	0.9101
均值	5.01367		1.00273			22.2822		1.11411			45.2277		0.904553
标准差			0.044688					0.0557723					0.0199467
RSD			0.0445662					0.05006					0.0220514
3-MHA					3-MHA					3-MHA
0	4.606	5	0.9212		0	21.665	20	1.08325		0	46.913	50	0.93826
0	4.326	5	0.8652		0	19.561	20	0.97805		0	54.151	50	1.08302
0	4.54	5	0.908		0	19.678	20	0.9839		0	52.123	50	1.04246
0	4.227	5	0.8454		0	19.28	20	0.964		0	52.585	50	1.0517
0	4.293	5	0.8586		0	20.375	20	1.01875		0	50.465	50	1.0093
0	4.265	5	0.853		0	20.132	20	1.0066		0	47.641	50	0.95282
均值	4.37617		0.875233			20.1152		1.00576			50.6463		1.01293
标准差			0.0314588					0.0428106					0.0574278
RSD			0.0359433					0.0425655					0.0566949
4-MHA					4-MHA					4-MHA
0	5.172	5	1.0344		0	21.723	20	1.08615		0	46.778	50	0.93556
0	5.264	5	1.0528		0	21.876	20	1.0938		0	44.966	50	0.89932
0	5.317	5	1.0634		0	21.4	20	1.07		0	47.626	50	0.95252
0	5.491	5	1.0982		0	20.31	20	1.0155		0	49.281	50	0.98562
0	5.397	5	1.0794		0	18.892	20	0.9446		0	48.822	50	0.97644
0	5.446	5	1.0892		0	19.623	20	0.98115		0	46.097	50	0.92194
均值	5.34783		1.06957			20.6373		1.03187			47.2617		0.945233
标准差			0.0239076					0.0611426					0.0328701
RSD			0.0223526					0.0592544					0.0347746
HA					HA					HA
0	4.663	5	0.9326		0	21.52	20	1.076		0	51.192	50	1.02384
0	4.283	5	0.8566		0	21.739	20	1.08695		0	51.454	50	1.02908
0	4.736	5	0.9472		0	21.937	20	1.09685		0	51.452	50	1.02904
0	4.536	5	0.9072		0	21.122	20	1.0561		0	51.526	50	1.03052
0	5.306	5	1.0612		0	21.82	20	1.091		0	51.639	50	1.03278
0	4.677	5	0.9354		0	21.416	20	1.0708		0	50.232	50	1.00464
均值	4.70017		0.940033			21.5923		1.07962			51.2492		1.02498
标准差			0.0675997					0.0149946					0.0103908
RSD			0.071912					0.0138888					0.0101375
	浓度	S/N	检出限	定量限
tt-MA	10	5388	0.00556793	0.0185598
2-MHA	10	17795	0.00168587	0.00561956
BMA	10	7225	0.00415225	0.0138408
MA	50	13061.1	0.0114845	0.0382816
PGA	10	16172	0.00185506	0.00618353
3-MHA	10	16715	0.0017948	0.00598265
4-MHA	10	14207	0.00211164	0.00703878
HA	10	23646	0.00126871	0.00422905
	tt-MA	回收率	结果(ppb)	2-MHA	回收率	结果	SPMA	回收率	结果	MA	回收率	结果	PGA	回收率	结果	3-MHA	回收率	结果	4-MHA	回收率	结果	HA	回收率	结果
1	4.094	99.5	41.1457	1.929	101.8	18.9489	0	0	0	176.403	93.5	1886.66	3.487	100.3	34.7657	3.929	87.5	44.9029	1.76	107	16.4486	759.047	102.5	7405.34
2	4.535	99.5	45.5779	2.792	101.8	27.4263	0	0	0	295.973	93.5	3165.49	6.484	100.3	64.6461	5.2	87.5	59.4286	1.791	107	16.7383	1496.3	102.5	14598
3	5.324	99.5	53.5075	2.855	101.8	28.0452	0	0	0	334.512	93.5	3577.67	7.157	100.3	71.3559	6.801	87.5	77.7257	2.199	107	20.5514	1695.3	102.5	16539.5
4	5.393	99.5	54.201	5.159	101.8	50.6778	0	0	0	396.251	93.5	4237.98	8.135	100.3	81.1067	9.135	87.5	104.4	2.589	107	24.1963	1989.92	102.5	19413.8
5	6.098	99.5	61.2864	6.072	101.8	59.6464	0	0	0	468.989	93.5	5015.93	8.472	100.3	84.4666	12.966	87.5	148.183	3.286	107	30.7103	2144.11	102.5	20918.2
6	6.852	99.5	68.8643	10.004	101.8	98.2711	0	0	0	486.198	93.5	5199.98	11.625	100.3	115.902	27.161	100.6	269.99	7.178	107	67.0841	2217.05	102.5	21629.7
7	7.376	99.5	74.1307	13.326	109.7	121.477	0	0	0	521.523	93.5	5577.79	11.863	100.3	118.275	27.189	100.6	270.268	7.868	107	73.5327	2220.97	102.5	21668
8	8.654	99.5	86.9749	13.393	109.7	122.088	0	0	0	555.754	93.5	5943.89	13.041	111.4	117.065	27.806	100.6	276.402	8.081	107	75.5234	2343.06	102.5	22859.1
9	8.666	99.5	87.0955	14.728	109.7	134.257	0	0	0	705.545	93.5	7545.94	13.682	111.4	122.819	28.023	100.6	278.559	9.011	107	84.215	2503.23	102.5	24421.7
10	8.887	99.5	89.3166	14.903	109.7	135.852	0	0	0	732.384	93.5	7832.98	17.895	111.4	160.637	35.797	101.3	353.376	9.229	107	86.2523	2928.94	102.5	28575
11	11.911	101.9	116.889	16.807	109.7	153.209	0.492	95.9	5.13034	754.054	93.5	8064.75	18.716	111.4	168.007	36.228	101.3	357.631	9.335	107	87.243	2942.53	102.5	28707.7
12	12.982	101.9	127.399	18.539	109.7	168.997	0.492	95.9	5.13034	761.832	93.5	8147.94	22.592	111.4	202.801	59.229	101.3	584.689	9.502	107	88.8037	3631.24	102.5	35426.7
13	13.807	101.9	135.496	36.96	104	355.385	0.492	95.9	5.13034	770.562	93.5	8241.3	23.012	111.4	206.571	74.845	101.3	738.845	23.31	103.2	225.872	4020.1	102.5	39220.5
14	14.238	101.9	139.725	40.246	104	386.981	0.493	95.9	5.14077	943.963	93.5	10095.9	23.746	111.4	213.16	121.838	101.3	1202.74	26.909	103.2	260.746	4110.38	102.5	40101.3
15	16.892	101.9	165.77	114.978	104	1105.56	0.493	95.9	5.14077	976.545	93.5	10444.3	33.663	111.4	302.181	208.019	101.3	2053.49	54.276	94.5	574.349	4417.69	102.5	43099.5
16	17.096	101.9	167.772	135.8	104	1305.77	0.493	95.9	5.14077	1005.06	93.5	10749.3	34.682	111.4	311.329	265.842	101.3	2624.3	76.524	94.5	809.778	4699.66	102.5	45850.3
17	18.949	101.9	185.957	151.436	104	1456.12	0.494	95.9	5.1512	1179.75	93.5	12617.7	39.552	90.5	437.039	359.829	101.3	3552.11	98.382	94.5	1041.08	7675.7	102.5	74884.8
18	19.321	101.9	189.607	211.504	104	2033.69	0.503	95.9	5.24505	1273.27	93.5	13617.8	53.185	90.5	587.68	462.607	101.3	4566.7	137.061	94.5	1450.38	12787.8	102.5	124759
19	56.478	96.3	586.48	679.26	104	6531.35	0.515	95.9	5.37018	3623.42	93.5	38753.2	84.173	90.5	930.088	1133.33	101.3	11187.9	292.104	94.5	3091.05	14328	102.5	139785
